# Supplementary material for: Prognostic value and clinicopathologic characteristics of L1 cell adhesion molecule (L1CAM) in a large series of vulvar squamous cell carcinomas
Source: PubMed Central journal article supplement (PMC5041974; doi:10.18632/oncotarget.8353), 2016-03-25
Supplement: oncotarget-07-26192-s001.pdf [file oncotarget-07-26192-s001.pdf]

**SUPPLEMENTARY FIGURES AND TABLES**

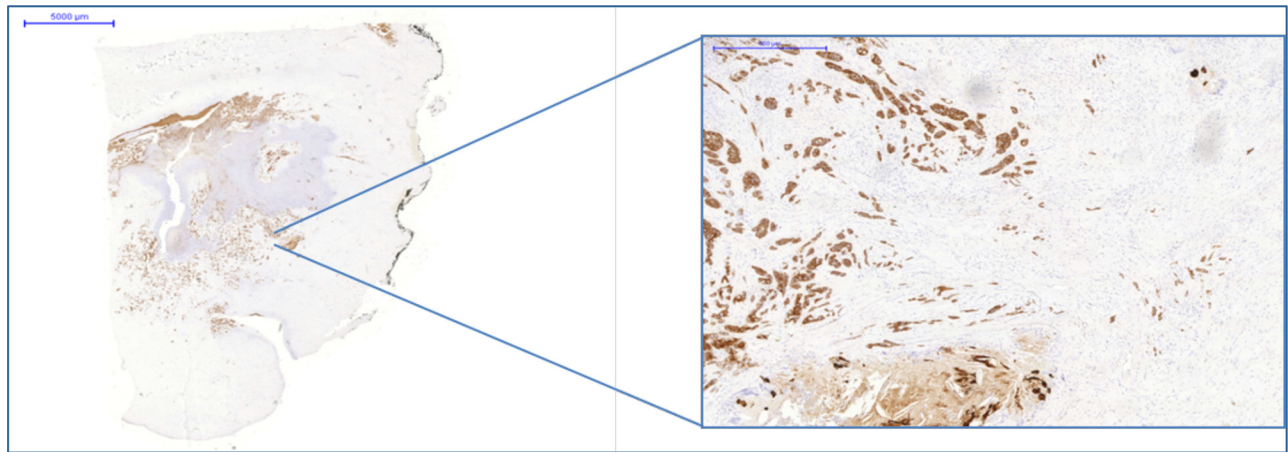

**Supplementary Figure S1:** Original tumour from which two cell line populations were isolated, stained for pancytokeratin showing both solid and spindle shaped tumour cells.

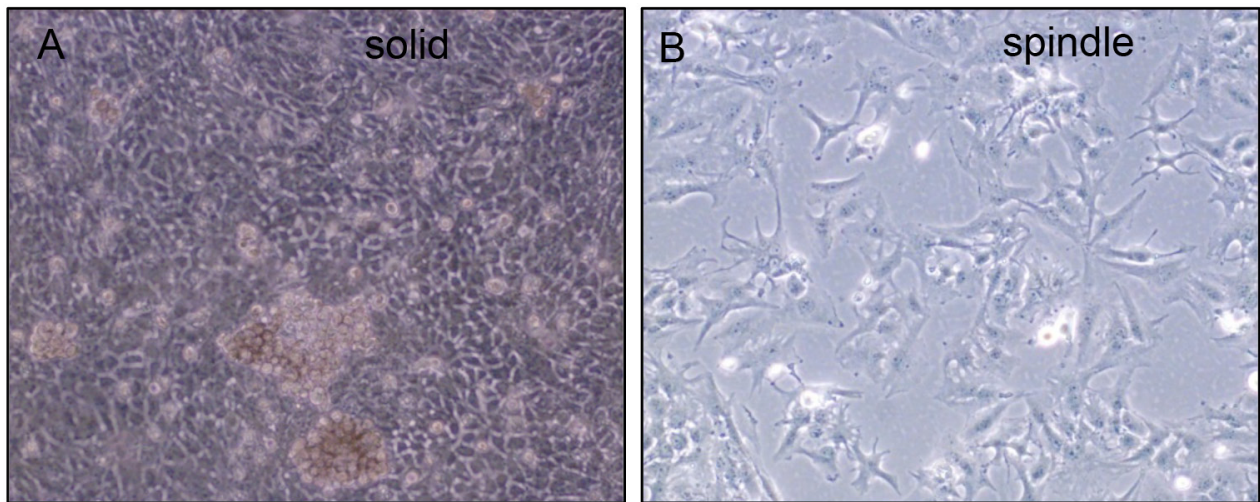

**Supplementary Figure S2:** Bright light microscopy images of the two cell populations consisting of cobble shaped cells from the 'solid' tumour **A**, and spindle shaped cells **B**.

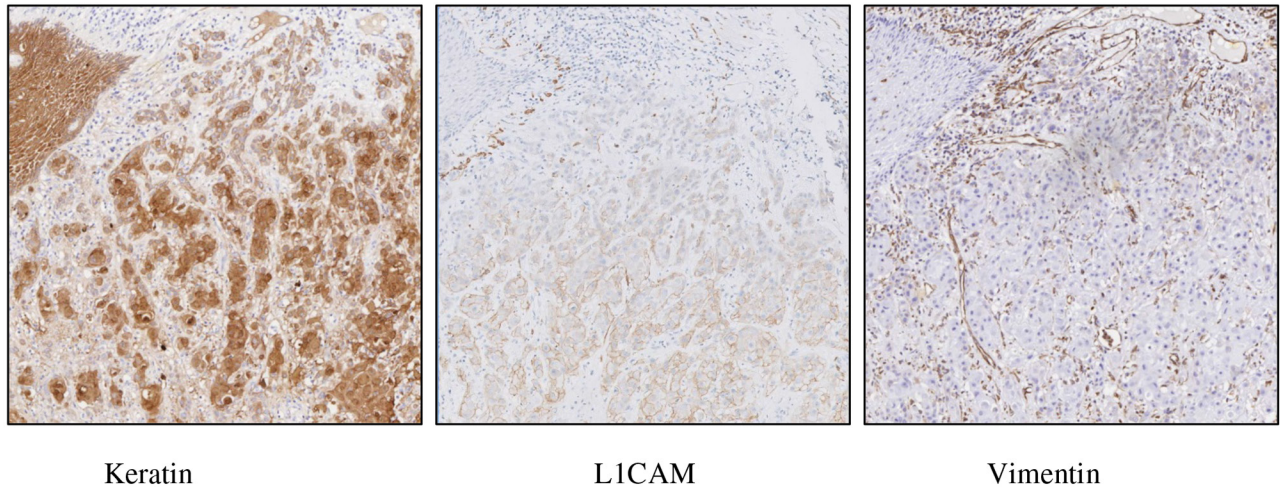

**Supplementary Figure S3:** Vimentin and Keratin expression in the tumour border of a vulvar cancer.

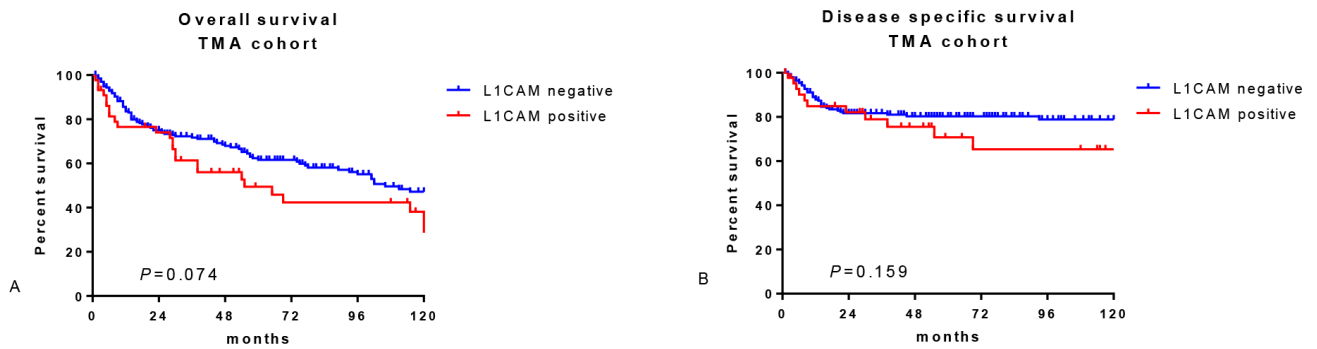

**Supplementary Figure S4:** Overall and disease specific survival curves of the TMA cohort (N=245).

Supplementary Table S1: Multivariate cox regression analysis for the TMA cohort (n=245)

| Disease specific survival |      |              |
|---------------------------|------|--------------|
| variable                  | HR   | 95% CI       |
| Lymph node metastasis     | 7.26 | 3.17 - 16.62 |
| Tumour size (mm)          | 1.02 | 1.01 - 1.04  |
| L1CAM staining            | 1.58 | 0.79 - 3.19  |
| Overall survival          |      |              |
| variable                  | HR   | 95% CI       |
| Lymph node metastasis     | 1.91 | 1.28 - 2.85  |
| Tumour size (mm)          | 1.02 | 1.01 - 1.03  |
| L1CAM staining            | 1.48 | 0.93 - 2.35  |

Supplementary Table S2: Patients characteristics of both the leiden and the TMA cohort together (n=348)

| Characteristic                 | n=348  |       | Value |              |
|--------------------------------|--------|-------|-------|--------------|
| Follow up                      | - mo   | (SD)  | 57.1  | (47.1)       |
| Age at diagnosis               | - year | (SD)  | 71.1  | (13.2)       |
| FIGO stage                     | - n    | (%)   |       |              |
| Stage 1                        |        |       | 78    | (22)         |
| Stage 2                        |        |       | 130   | (37)         |
| Stage 3                        |        |       | 96    | (28)         |
| Stage 4                        |        |       | 44    | (13)         |
| Lymph node metastases          | - n    | (%)   | 131   | (38)         |
| Extracapsular growth           | - n    | (%)   | 57    | (16)         |
| Tumor size                     | - mm   | (SD)  | 32.9  | (18.8)       |
| Infiltration depth             | - mm   | (IQR) | 7.0   | (4.0 - 10.0) |
| Positive resection margins     | - n    | (%)   | 42    | (12.1)       |
| Disease status                 | - n    | (%)   |       |              |
| Complete remission             |        |       | 234   | (67)         |
| Local recurrence               |        |       | 71    | (20)         |
| Regional recurrence            |        |       | 20    | (6)          |
| Distant recurrence             |        |       | 14    | (4)          |
| Died                           |        |       | 176   | (51)         |
| Disease specific death         |        |       | 75    | (22)         |
| 5-yr Overall survival          | - %    | (SD)  | 60.4  | (2.8)        |
| 5-yr Disease specific survival | - %    | (SD)  | 77.5  | (2.4)        |
| 5-yr Disease free survival     | - %    | (SD)  | 68.7  | (3.4)        |
